1           **A Novel Efficient L-Lysine Exporter Identified by Functional**

2                                       **Metagenomics**

3     Sailesh Malla, Eric van der Helm, Behrooz Darbani, Stefan Wieschalka, Jochen Forster,

4                                       Irina Borodina, Morten O. A. Sommer\*

5     *The Novo Nordisk Foundation Center for Biosustainability, Technical University of*

6     *Denmark, Kemitorvet 220, 2800 Kgs. Lyngby, Denmark*

7

8     \*Corresponding author:

9     Prof. Morten O. A. Sommer

10    Email: [msom@bio.dtu.dk](mailto:msom@bio.dtu.dk)

11

12 **Abstract**

13 Lack of active export system often limits the industrial bio-based production processes  
14 accumulating the intracellular product and hence complexing the purification steps. L-  
15 lysine, an essential amino acid, is produced biologically in quantities exceeding two  
16 million tons per year; yet, L-lysine production is challenged by efficient export system at  
17 high titres during fermentation. To address this issue, new exporter candidates for efficient  
18 efflux of L-lysine are needed. Using metagenomic functional selection, we identified 58  
19 genes encoded on 28 unique metagenomic fragments from cow gut microbiome library  
20 that improved L-lysine tolerance. These genes include a novel putative L-lysine  
21 transporter, belonging to a previously uncharacterized EamA superfamily.  
22 Characterization using *Xenopus oocyte* expression system as well as an *Escherichia coli*  
23 host demonstrates activity as a L-lysine transporter. This novel exporter improved L-  
24 lysine tolerance in *E. coli* by 40% and enhanced the specific productivity of L-lysine in  
25 an industrial *Corynebacterium glutamicum* strain by 12%. Our approach allows the  
26 sequence-independent discovery of novel exporters and can be deployed to increase titres  
27 and productivity of toxicity-limited bioprocesses.

28

29 **Keywords:** Amino acid, transporter, *E.coli*, *C. glutamicum*, *Xenopus oocytes*

30

## 31 **Introduction**

32 The global chemical industry is transitioning from reliance majorly on petrochemical  
33 processes to more sustainable bio-based production. This development holds promise to  
34 improve the sustainability of the chemical industry while also reducing the overall  
35 production costs of chemical products. In order to establish a cost competitive bioprocess,  
36 titers of fermentations frequently exceed 100 g/L, which leads to a significant stress on  
37 the host organism. Indeed, a majority of industrial bioprocesses are limited in production  
38 due to several stresses resulting from high product titers.

39

40 One of the most significant bio-based chemical products is L-lysine. The global bio-based  
41 L-lysine production now exceeds 2.5 million tons per year, which is estimated to reach  
42 3.0 million tons in 2022 corresponding to 5.6 billion USD of market value according to  
43 the current L-lysine market report (Elder, 2019). Industrial L-lysine bioprocesses entirely  
44 rely on *Corynebacterium glutamicum* and *Escherichia coli* production strains that achieve  
45 titers over 1.2 M (Becker and Wittmann, 2012; Lee and Kim, 2015). It was observed that  
46 the L-lysine export rate is inhibited by 50% upon exceeding the extracellular  
47 concentration of 400 mM compared to that at 80 mM (Kelle et al., 1996), indicating the  
48 substantial inhibition of the L-lysine-specific export in industrial fermentation. Indeed,  
49 several studies have demonstrated the benefit of incorporating active efflux systems to  
50 address intracellular product accumulation in biobased production (Borodina 2019;  
51 Hemberger et al., 2011; Malla et al., 2010). Hence, L-lysine export system is an obvious  
52 target to maintain the producer organism at high lysine concentration as well as easing the  
53 downstream process. Despite its importance, there are only two identified lysine specific  
54 exporters: i) LysE as a member of the lysine efflux permease (LysE; **2.A.75**) family  
55 (Bellmann et al., 2001; Vrljic et al., 1999); and, ii) lysine outward permease (LysO or

56 YbjE in *E. coli*) (Pathania and Sardesai, 2015). Vrljic et al. (1996) achieved five folds  
57 higher lysine export rate upon overexpression of LysE in *C. glutamicum* (Vrljic et al.,  
58 1996). Similarly, Yasueda and Gunji have deployed this strategy for ten-fold improvement  
59 in L-lysine production by expressing a spontaneously mutated LysE from *C. glutamicum*  
60 in *Methylophilis methylotrophus* (Gunji and Yasueda, 2006). In addition to the rational  
61 engineering of the existing exporters, there is an urgent demand for new genetic building  
62 blocks to further improve L-lysine tolerance and production.

63

64 Functional metagenomic selection is an effective approach to discover novel genes and  
65 enzymes due to its ability to access the wide range of genetic elements present in a  
66 particular environmental niche (Forsberg et al., 2016; Munck et al., 2015; Sommer et al.,  
67 2010, 2009). Hence, we set out to use functional metagenomic selection to identify novel  
68 L-lysine transporter candidates from a cow fecal library, with the goal of improving  
69 industrial L-lysine production (Fig. 1A). Using C13-labeled L-lysine and mRNA  
70 expression of the screened transporter in *Xenopus oocyte*, the transporter candidate was  
71 confirmed as L-lysine exporter. Expression of the metagenomic derived L-lysine  
72 transporter improved titer and productivity in both Gram-positive and Gram-negative  
73 production strains.

74

## 75 **Materials and methods**

### 76 **Bacterial strains, growth conditions and chemicals**

77 All bacterial strains, vectors and plasmids used in this study are listed in Table 1. All  
78 oligonucleotide primers (synthesized by Integrated DNA Technologies, Inc.) used are  
79 presented in Table 2. *E. coli* strains were routinely cultured at 37°C in Luria-Bertani (LB)  
80 broth or on agar supplemented with kanamycin (35 µg mL<sup>-1</sup>) when necessary (hereafter

81 referred as LB-km). For the L-lysine production in *E.coli* LB as well as M9 minimal media  
82 supplemented with 2 gm/L of yeast extract were used. *C. glutamicum* strains were cultured  
83 in modified CGXII medium (Keilhauer et al., 1993) supplemented with 5% sucrose, 1%  
84 BHI, 0.5 mM IPTG and kanamycin (when necessary), at 30°C and 250 RPM. Growth  
85 media were supplemented with 1.5% agar for plate assays.

86

87 DNA manipulations were carried out following standard protocols (Sambrook and  
88 Russell, 2001). All chemicals were purchased from Sigma-Aldrich (St. Louis, MO, USA).  
89 Restriction enzymes and T4 DNA ligase were purchased from Fermentas (Denmark) and  
90 New England Biolabs (Hertfordshire, UK). DNA sequencing was performed using an  
91 automated DNA sequence analyzer.

92

### 93 **Metagenomic library construction and functional screening for L-lysine**

94 A metagenomic expression library of total DNA extracted from a cow fecal sample was  
95 constructed as described previously (Sommer et al., 2009). Briefly, library construction  
96 involves i) the isolation of total DNA from 5 g of fecal material using the PowerMax Soil  
97 DNA Isolation Kit (Mobio Laboratories Inc.), ii) fragmentation of extracted DNA into  
98 pieces of an average size of 2 kb by sonication using a Covaris E210 (Massachusetts,  
99 USA) followed by end-repair using the End-It end repair kit (Epicentre), iii) blunt-end  
100 ligation into the pZE21 MCS1 expression vector with constitutive promoter pLteo-1 (Lutz  
101 and Bujard, 1997) at the *HincII* site using the Fast Link ligation kit (Epicentre), and iv)  
102 transformation of the ligated sample into electro-competent *E. coli* top10 cells by the  
103 standard method (One Shot® TOP10 Electropcomp™ Cells, Invitrogen).

104

105 After electroporation, cells were recovered in 1 ml of SOC medium for 1 h at 37°C, and  
106 the library was titered by plating out 1 µl, 0.1 µl and 0.01 µl of recovered cells onto LB-  
107 km plates. The insert size distribution was estimated by gel electrophoresis of the PCR  
108 products obtained by amplifying inserts using primers annealing to the vector backbone  
109 flanking the *HincII* site. The average insert size for the library was 1.7 kb. The total size  
110 of the metagenomics library was determined by multiplying the average insert size by the  
111 number of colony forming units (CFU) per ml ( $5 \times 10^8$  bp). The remainder of the recovered  
112 cells were inoculated into 10 ml of LB-km liquid media and grown overnight; the library  
113 was frozen down in 15% glycerol and stored at -80°C.

114

115 The *E. coli* C4860 strain was used for the functional screening of L-lysine. First, a plasmid  
116 prep of the metagenomics library was carried out from the *E. coli* top10 cells harboring  
117 the library. Then, 400 ng of metagenomics plasmid DNA was transformed into electro-  
118 competent *E. coli* C4860 cells, and the library titer was determined as described above.  
119 On the basis of the determined library sizes and the titer of the library,  $10^6$  cells (i.e., 100  
120 µl of the library cells) were plated on LB-km agar supplemented with L-lysine at the  
121 selective concentration (14 g/L). Plates were incubated at 37°C, and the growth of colonies  
122 (likely lysine-tolerant clones) was assayed after 48-65 h of incubation.

123

124 The metagenomic inserts present in L-lysine-tolerant clones were Sanger sequenced using  
125 the pZE21\_F and pZE21\_R primer pair, which annealed to the vector backbone. The  
126 resulting raw sequencing chromatogram files were analyzed and functionally annotated  
127 using the deFUME web server (van der Helm et al., 2015):  
128 <http://www.cbs.dtu.dk/services/deFUME/>.

129

### 130 **Minimum inhibitory concentration (MIC) and IC90 determination**

131 For MIC determination, the *E. coli* strains were cultured in LB liquid media at 37°C  
132 overnight, and then approximately  $1 \times 10^4$  cells were inoculated from the overnight cultures  
133 into LB liquid media and grown at 30°C and 300 RPM in 96-well microtiter plates  
134 containing 150 µl of medium per well. MICs were determined using a logarithmic L-  
135 lysine (or chemical) concentration gradient with two-fold serial dilutions. Endpoint  
136 absorbance measurements ( $A_{600\text{nm}}$ ) were taken with a plate reader (Synergy H1, BioTek)  
137 after 24 or 48 h of incubation and were background-subtracted. Growth inhibition of the  
138 *E. coli* strains was plotted against L-lysine (chemical) concentration with a polynomial  
139 interpolation between neighboring data points using R software ([http://www.r-](http://www.r-project.org)  
140 [project.org](http://www.r-project.org)). The percentage of inhibition was calculated using the formula:  $1 - [A_{600\text{nm}}$   
141  $\text{lysine (or chemical)}/A_{600\text{nm control}}$ ]. The inhibitory concentration was defined as the lowest  
142 concentration of the chemical that inhibited 90% of the growth of the strain tested (IC90).

143

### 144 **Growth experiments**

145 Single colonies of the tolerant clone(s) harboring transporter homologues were grown  
146 overnight at 37°C with shaking in liquid LB-km medium. The OD values at 600 nm  
147 [ $(\text{OD})_{600\text{nm}}$ ] were determined by 10-fold dilution. Then, the cultures were diluted to adjust  
148 the  $(\text{OD})_{600\text{nm}}$  to 0.1, and 5 µl of each culture was inoculated in 150 µl fresh media  
149 containing L-lysine (0 and 8 g/L) and kanamycin in a 96-well micro-titer plate. The plate  
150 was incubated at 37°C for 24 h in an automated spectrophotometer (ELx808, BioTek) that  
151 recorded the  $(\text{OD})_{630\text{nm}}$  at an interval of 60 min. The data were subsequently retrieved and  
152 analyzed to determine growth rates. The growth rate data are the average of triplicate  
153 experiments, with error bars representing the standard error of the mean (SEM).

154

155 **PCR and *E. coli* transformation**

156 PCR was performed in a total volume of 50 µl under the following DNA amplification  
157 conditions: 95°C for 5 min, followed by 30 cycles of 95°C for 30 sec, 50–65°C for 30 sec,  
158 and 72°C for 1 min, and finally 72°C for 5 min. Electrocompetent or chemically  
159 competent *E. coli* cells were transformed with the ligation mixture using a standard  
160 protocol and plated onto LB-km agar plates for selection.

161

162 ***In silico* analysis**

163 The amino acid sequence of MglE (**M**etagenomics **g**ene for **L**ysine **E**xport) was analyzed  
164 using Interpro (<http://www.ebi.ac.uk/interpro/v>), its 2D membrane topology was  
165 predicted using Phobius (Käll et al., 2007) and visualized using Protter (Omasits et al.,  
166 2014), and the phylogenetic tree was plotted using iTOL. The UniProtKB database  
167 (Consortium, 2014) was accessed on 2016-06-01 to query the closest homologs of MglE.  
168 Pfam version 29.0 (December 2015) (Finn et al., 2014) was used to extract the LysE  
169 family (Pfam id: PF01810) members. The Maximum Likelihood Phylogenetic tree was  
170 constructed using CLC Main Workbench 7 with the Neighbor Joining construction  
171 method.

172 **Transport assays in *Xenopus* oocytes**

173 The *Xenopus laevis* oocytes were obtained from Ecocyte Bioscience (Germany). Oocytes  
174 were kept in Kulori buffer (pH 7.4) and at 18°C. A linear cassette (including T7 promoter,  
175 MglE as the gene of interest, and 3'UTR) was amplified from the plasmid pUSER016-  
176 T7-MglE using Phusion Hot Start polymerase (ThermoFisher Scientific) and the primers  
177 linear\_cassette F and linear\_cassette R. The linear cassette was used as template for *in-*  
178 *vitro* transcription. Capped cRNAs was synthesized using the mMACHINE  
179 mMACHINE® T7 Transcription Kit (AM1344; ThermoFisher). The quality and quantity



180 of the RNA were determined by Agilent 2100 Bioanalyzer. For microinjection of cRNA  
181 and <sup>13</sup>C-labeled L-lysine, we used the RoboInject (Multi Channel Systems, Reutlingen,  
182 Germany) automatic injection system (Darbani et al., 2019). Injection needles with  
183 opening of 25 µm were used (Multi Channel Systems, MCS GmbH). For expression in  
184 oocytes, 25 ng of the *in-vitro* transcribed cRNA for the MglE transporter was  
185 microinjected into the oocytes 3 days prior to transport assays. To perform the export  
186 assay, 50 nl of the <sup>13</sup>C-labeled L-lysine stock solution was injected into the oocytes to  
187 obtain estimated internal concentrations of 6 mM, assuming an after-injection dilution  
188 factor of 20 (Darbani et al., 2016). Following four washing steps, each batch of 20 oocytes  
189 was incubated for 180 min in 90 µl Kulori buffer at pH 5 or pH 7.4. After incubation, 70  
190 µl of the medium was collected from each batch with intact oocytes and added onto 70 µl  
191 of 60% MeOH before LC-MS analysis. The oocytes were washed four times with Kulori  
192 buffer pH 7.4 and intracellular metabolites were extracted in 30% MeOH to analyzed on  
193 LC-MS.

#### 194 ***E. coli* double deletion mutant construction**

195 The chromosomal lysine decarboxylases *ldcC* and *cadA* in *E. coli* W3110 were  
196 successively knocked out by PCR targeting to create *E.coli* DMLC strain. The gene  
197 disruption process was carried out as described previously using an ampicillin-resistant  
198 pSIJ8 helper plasmid containing both the λ Red and FLP systems (Jensen et al., 2015).  
199 The primer pair *IdcC\_F2/IdcC\_R* (situated 64 bp away from the start/stop codon *ldcC*  
200 gene) was used to amplify the kanamycin cassette from the genomic DNA of the *ldcC*  
201 inframe knocked out Kieo strain b0186 whereas the primer pair *CadA\_F2/CadA\_R*  
202 (situated 56 bp away from the start/stop codon *cadA* gene) was used to amplify the  
203 kanamycin cassette from the genomic DNA of the *cadA* inframe knock-out Kieo strain

204 b4131. These PCR products were used to delete *ldcC* and *cadA* in *E. coli* W3110 strain.

205 The detail process of construction of *E. coli* DMLC is given in supplementary materials.

## 206 **Plasmid construction**

### 207 *Sub-cloning the metagenomic insert implicated in tolerance phenotypes*

208 The recombinant plasmids pZE-MgIE and pZE0-P-MgIE-T were constructed as described

209 below. The construction of recombinant plasmids was verified by both restriction

210 mapping and direct nucleotide sequencing of the respective genes in the recombinant

211 plasmids.

212

213 Using the oligonucleotide pair MgIE\_F/MgIE\_R and the pZE-RCL-MgIE plasmid as

214 template DNA, the exact *orf* of the putative carboxylate/amino acid transporter

215 homologue (referred to as MgIE) was amplified. The amplicon was purified with a Qiagen

216 PCR purification kit and digested with the restriction enzymes *KpnI* and *HindIII* (NEB,

217 UK), followed by ligation using T4 DNA ligase (Fermentas, Denmark) into the

218 corresponding restriction sites of the multiple cloning site (MCS) of the pZE21 vector to

219 construct the recombinant plasmids pZE-MgIE.

220

221 To construct the recombinant plasmid pZE0-P-MgIE-T, USER cloning was applied. The

222 pZE21-vector backbone without its promoter (pZE0) was amplified using the

223 oligonucleotide pair pZE21\_User\_F/pZE21\_User\_R. The putative carboxylate/amino

224 acid transporter homologue and the native promoter and terminator sequences (P-MgIE-

225 T fragment) were amplified from the pZE-RCL-MgIE plasmid using the primer pair P-

226 MgIE-T\_User\_F/P-MgIE-T\_User\_F. The amplified PCR products were ligated into the

227 recombinant plasmid pZE0-P-MgIE-T using the recommended standard USER cloning

228 protocol (NEB, UK).

229

230 *Codon optimized mglE plasmids construction for oocytes expression study*

231 For functional analysis of MglE in *Xenopus* oocytes, we constructed recombinant plasmid  
232 pUSER016-pT7-MglE by USER cloning. The pUSER016 vector backbone was digested  
233 with *PacI* for 18 h and the ends were further nicked with Nt.BbvCI for two hours. The  
234 codon optimized *mglE* gene (sequence provided in supplementary data) for *Xenopus*  
235 *laevis* was synthesized along with N-terminal linker sequence- GGCTTAAU and C-  
236 terminal linker sequences -ATTAAACC (in the complementary sequence, T is replaced  
237 by U for pairing with A) including uracil with compatible USER sites easing direct cloning  
238 into linearized and nicked pUSER016 vector by USER cloning (USER<sup>®</sup>, NEB), resulting  
239 in plasmid pUSER016-pT7-MglE.

240

241 *Recombinant plasmids with E.coli lysine exporter and homologous genes of mglE.*

242 The lysine exporter, *ybjE*, (900 bp, Genbank accession no. CAQ31402) from *E.coli* BL21  
243 (DE3) was amplified using oligonucleotides YbjE-F and YbjE-R. The PCR product of  
244 *ybjE* was cloned into pZE21 vector excised with *KpnI* and *BamHI* restriction enzymes to  
245 construct pZE-YbjE expression plasmid.

246

247 Similarly, four *mglE* homologous genes; i) Gene1 (891 bp, 82% identity, Genbank  
248 accession no. CDC57518) from *Bacteroides coprophilus* CAG:333, ii) Gene2 (891 bp,  
249 78% identity, Genbank accession no. WP\_018711839) from *Bacteroides barnesiae*, iii)  
250 Gene3 (870 bp, 54% identity, Genbank accession no. CDC66277) from *Bacteroides sp.*  
251 CAG:770, iv) Gene4 (912 bp, 43% identity, Genbank accession no. CCZ76555) from  
252 *Alistipes finegoldii* CAG, were synthesized along with N-terminal linker sequence -  
253 AATTCATU AAAGAGGAGAAAGGTACC and C-terminal linker sequence -

254 GTCGACGGTATCG ATAAGCTT (in the complementary sequence, T is replaced by U  
255 for pairing with A) including uracil easing direct user cloning. These four synthesized  
256 gene fragments were cloned into the linear PCR fragment of pZE21 vector amplified by  
257 using oligonucleotides pZE21\_User-F4 and pZE21\_User-R4 (Table 2) to construct pZE-  
258 Gene1, pZE-Gene2, pZE-Gene3 and pZE-Gene4 recombinant plasmids, respectively.

259

### 260 **Construction of recombinant industrial *Corynebacterium glutamicum* strains**

261 The full metagenomics insert derived from pZE-RCL-MglE plasmid was amplified using  
262 the primer pair RCL-MglE-F/RCL-MglE-R. The resulting PCR product was cloned into  
263 pEKEx2 vector, using the *KpnI* and *SacI* restriction sites, yielding expression plasmid  
264 pEK-RCL-MglE. The newly constructed expression plasmid was introduced into the  
265 industrial L-lysine producing strain *C. glutamicum* VL5 by electroporation and  
266 concomitant selection on kanamycin containing 2xTY-Agar. Successful construction of  
267 the new strain, named *C. glutamicum* VL5/pEK-RCL-MglE, was verified by re-isolation  
268 of the plasmid, followed by control digest and PCR on the length of the insert. The same  
269 procedure was performed to introduce the empty pEKEx2 expression vector into *C.*  
270 *glutamicum* VL5, yielding control strain *C. glutamicum* VL5/pEKEx2.

271

### 272 **Analysis of L-lysine in supernatant of bacterial culture**

273 A calibration curve of an authentic standard was generated using concentrations ranging  
274 from 0.4 to 77 mg/L. The accurate mass of L-lysine from 20-fold diluted samples  
275 (supernatants containing L-lysine for quantification) was analyzed using an LC-MS  
276 Fusion (Thermo Fisher Scientific, USA) with positive electrospray ionization (ESI+). The  
277 final concentration was adjusted for the dilution factor. Bracketing calibration was used  
278 for the quantification of the external concentration. For the quantification of L-lysine, an

279 LC-MS/MS, EVOQ (Bruker, Fremont USA) was used with multiple reaction monitoring  
280 (MRM) transition in positive ionisation mode (ESI+), with the quantified transition  
281 147→84 (CE 10) and qualifier transition 147→130 (CE 7). The significance of the  
282 specific lysine production was calculated using a Student t-test.

283

## 284 **Results and Discussion**

### 285 **Identification of metagenomic L-lysine tolerance genes**

286 The gut microbiota from industrial livestock animals are conceivably enriched with the  
287 microbes capable to survive at higher L-lysine concentration which is supplied as food  
288 additives. A metagenomic library derived from cow feces was constructed and used to  
289 find candidate genes that could lead to a higher L-lysine tolerance in *E.coli* C4860 strain.  
290 The resulting library was screened for L-lysine tolerance by plating on LB agar plates  
291 supplemented with inhibitory concentrations of L-lysine ([Fig. 1A](#)) (materials and  
292 methods). Colonies appeared only on the plates with the metagenomic library but not on  
293 the control plates with *E.coli* C4860 harboring empty vector. Eighty L-lysine tolerant  
294 clones were selected for further analysis.

295 Metagenomic inserts present in those L-lysine tolerant clones were PCR amplified,  
296 sequenced and annotated using deFUME (van der Helm et al., 2015). In total, 28 unique  
297 clones containing 58 complete or partial open reading frames were identified in this  
298 analysis. The sequence analysis revealed that resistant clones contained *orfs* homologous  
299 to genes encoding L-lysine modification/degradation enzymes, membrane proteins,  
300 signaling proteins and hypothetical proteins. ([Supplementary Table S1](#)).

301

### 302 **Selection of transporter candidates**

303 For the purpose of improving industrial production strains, novel efflux systems constitute  
304 more relevant genetic building blocks than those involved in degradation and  
305 modification, which would counteract the objective of L-lysine production. Accordingly,  
306 we focused our subsequent analysis on *orfs* encoding potential efflux systems. We  
307 identified six unique metagenomic inserts encoding putative membrane proteins, some of  
308 which are annotated in Genbank as hypothetical proteins ([Supplementary Table S1](#)). Four  
309 inserts were selected for further testing based on the absence of putative degradation  
310 enzymes flanking the putative transporters on the metagenomic insert.

311

312 We determined the L-lysine IC<sub>90</sub> values for each of the four selected metagenomic inserts.  
313 The L-lysine IC<sub>90</sub> values of the selected metagenomic clones ranged from  $10.44 \pm 1.277$   
314 g/L to  $14.25 \pm 0.415$  g/L, corresponding to a more than 40% increase in the L-lysine IC<sub>90</sub>  
315 for the clone harboring pZE-RCL-MglE compared to the empty vector control strain ([Fig.](#)  
316 [1B](#)). All of these strains have similar growth profiles in LB medium, whereas the growth  
317 rates varied in the liquid LB supplemented with 8 g/L of L-lysine. At 8 g/L L-lysine  
318 supplementation, the growth rate of the highest tolerant metagenomic clone harboring  
319 pZE-RCL-MglE was 30% higher than that of the empty vector control ([Fig. 1C](#)).

320

### 321 **Lysine tolerance by MglE in *E. coli* strains**

322 To test whether the pZE-RCL-MglE plasmid carrying the *mglE* gene could confer L-  
323 lysine tolerance to industrially relevant *E. coli* strains, we introduced the plasmid into  
324 various *E. coli* strains; BL21 (DE3), MG1655, Crooks, W1116, and W3110 and IC<sub>90</sub>  
325 values of L-lysine were determined for all of the constructed *E. coli* strains. Interestingly,  
326 the IC<sub>90</sub> values of L-lysine for all of these *E. coli* strains were increased upon introduction  
327 of the pZE-RCL-MglE plasmid ([Fig. 1D](#)). Of particular interest, the L-lysine IC<sub>90</sub> was

328 increased by 30% in W3110, which is a widely used background strain for L-lysine  
329 production (Imaizumi et al., 2005). These data demonstrate that the mechanism of L-  
330 lysine tolerance mediated by pZE-RCL-MgIE is effective across the industrially relevant  
331 *E. coli* strains and accordingly should be generally applicable to industrial *E. coli*-based  
332 L-lysine fermentations.

333

### 334 **Protein sequence analysis of the metagenomic insert carrying MgIE**

335 Sequence analysis of the 1.6 kb PCR amplicon from pZE-RCL-MgIE metagenomics insert  
336 contained an open reading frame *mgIE* flanked by native promoter and terminator  
337 sequences (Fig. 2A). The MgIE protein consists of 297 amino acids, and its closest  
338 homolog is a hypothetical protein from *Bacteroides coprophilus* (Genbank accession no.  
339 WP\_008140691) with 82% identity at the amino acid level. The MgIE protein is a member  
340 of RhaT/EamA-like transporter family of the drug/metabolite transporter (DMT; 2.A.7)  
341 superfamily. The MgIE contains two copies of the EamA domain, which is found in  
342 transporters belonging to the EamA family, at 9–143 aa (pfam (Finn et al., 2014) e-value:  
343  $3e^{-11}$ ) and 152–292 aa (pfam e-value  $9.6e^{-12}$ ). The members of the EamA family are  
344 diverse, and most of their functions are unknown (Franke et al., 2003). Nevertheless, a  
345 few proteins belonging to EamA family are well characterized as exporters such as PecM  
346 exports a pigmented compound indigoidine in *Erwinia chrysanthemi* (Rouanet and  
347 Nasser, 2001) and YdeD export metabolites of the cysteine pathway in *E. coli* (Daßler et  
348 al., 2000). The predicted two-dimensional topology of the MgIE transporter possesses six  
349 cytoplasmic domains, five periplasmic domains, and ten transmembrane domains, with  
350 both the N- and C-terminals in the cytoplasmic region (Fig. 2B).

351

352 Phylogenetic analysis shows that the closest MglE homologs (>50% sequence identity)  
353 are present in the phylum Bacteroidetes and are annotated as uncharacterized proteins  
354 (Fig. 2C). Members of the LysE family (pfam id: PF01810) are mainly (>5 species per  
355 phyla) found in the phyla: Proteobacteria, Bacteroidetes, Firmicutes, Actinobacteria. The  
356 full list of phyla that contain species with a LysE domain are Proteobacteria: 102,  
357 Bacteroidetes: 73, Firmicutes: 45, Actinobacteria: 28, Chloroflexi: 1, Cyanobacteria: 3,  
358 Spirochaetes: 1, Verrucomicrobia: 1 and Gemmatimonadetes: 1. Interestingly, nine  
359 genomes containing the MglE homolog also contain additional LysE family (pfam id:  
360 PF01810, TC code: **2.A.75**) genes (Fig. 2C orange dot). MglE represents a novel L-lysine  
361 transporter that could not have been identified by sequence analysis or homology to  
362 known L-lysine transporters.

363

#### 364 **Effect of regions in the metagenomics insert on L-lysine tolerance**

365 To investigate the effects of promoter region of the metagenomic clone on lysine  
366 tolerance, the recombinant plasmids pZE-MglE (*mglE* cloned into pZE21), and pZE0-P-  
367 MglE-T (MglE along with its native promoter and terminator cloned into pZE21 without  
368 the pLteo-1 vector promoter) were subcloned from pZE-RCL-MglE plasmid. The  
369 constructed plasmids were transformed into *E. coli* C4860, and IC90 values of L-lysine  
370 were determined (Fig. 2D). Although these recombinant C4860 strains grew in the same  
371 extent in LB media, they showed different L-lysine tolerance. We observed that the IC90  
372 for the strain harboring the pZE0-P-MglE-T plasmid was higher than that of the strain  
373 harboring the pZE-MglE plasmid, indicating that the native promoter resulted in higher  
374 lysine tolerance than the vector promoter. However, the synergistic effect of these two  
375 promoters was better still (i.e., the IC90 values of the pZE-RCL-MglE plasmid was higher  
376 than those of the strains harboring pZE-MglE or the pZE0-P-MglE-T plasmids). Hence,



377 the lysine tolerance of the *E. coli* C4860 strain was the highest upon harboring the full  
378 metagenomic insert (i.e., pZE-RCL-MgIE).

379

### 380 **MgIE exports L-lysine when expressed in *Xenopus* oocytes**

381 For functional analysis, MgIE was expressed in *Xenopus* oocytes and the export of C13-  
382 labeled L-lysine was measured. The water-injected oocytes were used as negative control.

383 L-lysine export assay was performed by injecting C13-labeled L-lysine to obtain a final  
384 cytosolic concentration of 6 mM in the oocytes. The oocytes were incubated in Kulori

385 buffers with two different pH (pH 5 and 7.4) for 3 h, and L-lysine concentrations were  
386 measured in the buffer and within the oocytes. MgIE-expressing oocytes resulted in 6.6-

387 and 8.5-fold higher extracellular concentrations of C13-labeled L-lysine and natural C12  
388 L-lysine respectively than control oocytes, when buffer with pH 5 was used (Fig. 3Ai).

389 The intracellular concentrations of C13-labeled and natural C12 L-lysine were  
390 correspondingly 2.1- and 1.4-fold lower than in control oocytes (Fig. 3Ai). On the other

391 hand, there was no significant change in L-lysine quantities when oocytes were incubated  
392 at pH 7.4 (Fig. 3Aii). This indicates a proton-gradient dependent export mechanism for

393 MgIE transporter. L-lysine resistance (uptake) experiments in *E. coli* also indicated a  
394 proton-dependent uptake for L-lysine because L-lysine toxicity was higher at pH 8.5 and

395 10 than at pH 4.5 and 7 (data not shown).

396

### 397 **MgIE assists L-lysine export in *E. coli***

398 To analyze the function of MgIE for L-lysine efflux, *E. coli* DMLC strain was constructed  
399 by knocking out two lysine decarboxylase genes, constitutive (*ldcC*) and acid-inducible

400 (*cadA*). These deletions should prevent L-lysine degradation, thereby leading to increased

401 L-lysine production (Kikuchi et al., 1997). Then, the pZE-RCL-MgIE plasmid and pZE21

402 empty vector were transformed into *E. coli* DMLC, yielding *E. coli* DMLC/pZE-RCL-  
403 MglE and *E. coli* DMLC/pZE21, respectively. Subsequently, these strains along with *E.*  
404 *coli* W3110/pZE21, were cultured in LB media as well as M9 minimal media  
405 supplemented with yeast extract. The bacterial growth and extracellular L-lysine  
406 concentrations were measured after 24 h. We found that in LB media the absolute  
407 extracellular L-lysine titer was increased from 744 mg/L to 806 mg/L in presence of the  
408 metagenomic insert consisting MglE operon i.e. 8.3% higher L-lysine production in the  
409 *E. coli* DMLC/pZE-RCL-MglE strain as compared to *E. coli* DMLC/pZE21 in LB.  
410 However, the biomass of the strain expressing MglE was decreased by about 50% as  
411 compared to the control strain (Fig. 3Bi). Furthermore, the L-lysine production was  
412 analysed in minimal media supplementing yeast extract. In minimal media, the  
413 extracellular L-lysine accumulation was increased from 6 mg/L to 30 mg/L ( $p < 0.0001$ , t-  
414 test) whereas there was 12% reduced in biomass upon expressing the MglE metagenomic  
415 fragment (Fig. 3Bii). The difference in extracellular L-lysine concentration among the  
416 strain expressing MglE and the control strain is prominent in minimal media ( $p < 0.0001^*$ ,  
417 t-test) than in LB media ( $p = 0.1997$ , t-test). Hence, the above results demonstrate that  
418 MglE assists exporting L-lysine from *E. coli*.

419

420 The reduced biomass might be due to the combined effect of expression of membrane  
421 protein in high copy number and active export of L-lysine by MglE which could have  
422 resulted in less available energy for the cell to build biomass. It is worth noting that a big  
423 proportion of total cellular energy-demand is for the transport machinery which has  
424 accordingly been under evolutionary selection towards a higher energetic efficiency  
425 (Darbani et al., 2018).

426

## 427 **Improvement of L-lysine productivity in industrial *C. glutamicum* strain**

428 Expression of a functionally active gene(s) from one strain to another often requires  
429 special optimizations. For the practical application in industrial L-lysine bioprocesses,  
430 retaining the activity of the discovered exporter into the production host, *C. glutamicum*,  
431 is very essential. To test whether the MglE can boost the L-lysine bioprocesses, we cloned  
432 and expressed it in an industrially used *C. glutamicum* L-lysine production strain.

433

434 The full metagenomic insert carrying the MglE along with its native promoter and  
435 terminator was amplified from the pZE-RCL-MglE plasmid and cloned into pEKEx2  
436 expression vector to construct pEK-RCL-MglE expression plasmid. The constructed  
437 plasmid was introduced into *C. glutamicum* VL5 strain (Materials and methods), a  
438 producer strain currently used for industrial L-lysine production. Using sucrose as a  
439 carbon source, L-lysine production from the constructed *C. glutamicum* recombinant  
440 strain was analyzed at 30 h. Unlike in *E. coli* strains, expression of the full metagenomics  
441 insert harboring MglE did not have any growth inhibition effect as the vector control and  
442 the recombinant strains both have nearly equal biomass. Notably, upon incorporation of  
443 the MglE operon into *C. glutamicum*, the specific L-lysine productivity was improved by  
444  $12 \pm 0.07\%$  relative to the empty vector control (Fig. 3C). By expressing the operon in  
445 this highly efficient producer strain, we showed not only the functionality of the MglE in  
446 a Gram-positive species but also the benefit of the efflux system on an already highly  
447 optimized producer strain.

448

## 449 **Comparison of L-lysine tolerance conferred by MglE and its homologous genes**

450 The YbjE transporter from *E. coli* is one of the functionally characterized lysine-specific  
451 exporters. Based upon the homology search, four genes in the NCBI database having

452 different homologies (ranging from 43% to 82% in amino acid level) with MglE were also  
453 selected and gene synthesized. To find out the lysine tolerance of MglE as compared to  
454 that of YbjE and the four selected MglE homologous proteins (with 82, 78, 54 and 43%  
455 amino acid sequence identity), recombinant expression plasmids pZE-YbjE, pZE-Gene1,  
456 pZE-Gene2, pZE-Gene3 and pZE-Gene4 were constructed. The constructed plasmids,  
457 pZE-MglE and pZE21 vector control were introduced into *E.coli* C4860 and *E.coli* DMLC  
458 strains and determined the IC90 of L-lysine for the constructed recombinant strains as  
459 described in early experiments.

460

461 Interestingly, we found that the expression of MglE provided similar L-lysine tolerance  
462 in *E.coli* C4860 strain as that of YbjE whereas in *E.coli* DMLC strain, MglE displayed  
463 even higher tolerance than YbjE. On the other hand, all of the four MglE homologs  
464 showed lower lysine tolerance than MglE in both strains (Fig. 4).

465

## 466 **Conclusion**

467 We deployed functional metagenomic selections to identify novel genetic building blocks  
468 encoding product efflux systems. Through applying this approach to the problem of L-  
469 lysine toxicity at high concentration, we discovered MglE, which is confirmed as a novel  
470 type of L-lysine exporter that belongs to the EamA superfamily. We demonstrate the  
471 benefits of MglE in both Gram-negative (*E. coli*) and Gram-positive (*C. glutamicum*)  
472 strains and show that MglE expression improves the productivity of an industrial L-lysine  
473 production strain. If incorporated into industrial-scale bioprocesses, this discovery has the  
474 potential to enhance L-lysine production by about 12%, representing an increased profit  
475 on the order of 200-500 million USD per year. Our approach of using functional  
476 metagenomics to identify novel transporters is independent of prior knowledge of

477 transporter gene sequences and can be generally applied to most of the toxic  
478 compounds/chemicals production by fermentation.

479

#### 480 **Protein accession numbers**

481 The sequence information of full metagenomics insert harboring *mglE* is deposited in  
482 the NCBI GenBank database with the accession number KU708839.

483

#### 484 **Acknowledgements**

485 The research leading to these results was funded by the Novo Nordisk Foundation (Grant  
486 Agreement no. NNF10CC1016517), and the European Union Seventh Framework  
487 Programme (FP7-KBBE-2013-7-single-stage) under grant agreement no. 613745,  
488 Promys. This work was further supported by the European Union Seventh Framework  
489 Programme-ITN (FP7/2012/317058 to E.v.d.H). Stefan Wieschalka acknowledges  
490 funding from Højteknologifonden. IB acknowledges the financial support the European  
491 Research Council under the European Union's Horizon 2020 research and innovation  
492 programme (YEAST-TRANS project, Grant Agreement no. 757384). We would like to  
493 thank Vitalys I/S for providing the VL5 strain for lab-scale testing, Christian Munk for  
494 helping with R-script to calculate IC90 values.

#### 495 **Competing financial interests**

496 The authors declare no competing financial interests.

#### 497 **Author contributions**

498 M.O.A.S. and S.M. conceived the study; S.M. designed and performed *E.coli*  
499 experiments, B.D and I.B. conceived the experiments on *Xenopus oocytes* and B.D.  
500 performed experiments. S.W. performed *C. glutamicum* experiments, E.v.d.H performed

501 *in silico* analysis. M.O.A.S., I.B., and J.F. led the research teams. M.O.A.S. and S.M.

502 drafted the manuscript and the other authors contributed to the writing.

503

504 **References**

505

506 Archer, C.T., Kim, J.F., Jeong, H., Park, J., Vickers, C.E., Lee, S., Nielsen, L.K., 2011.  
507 The genome sequence of *E. coli* W (ATCC 9637): comparative genome analysis  
508 and an improved genome-scale reconstruction of *E. coli*. *BMC Genomics* 12, 9.  
509 <https://doi.org/10.1186/1471-2164-12-9>

510 Baba, T., Ara, T., Hasegawa, M., Takai, Y., Okumura, Y., Baba, M., Datsenko, K. a,  
511 Tomita, M., Wanner, B.L., Mori, H., 2006. Construction of *Escherichia coli* K-12  
512 in-frame, single-gene knockout mutants: the Keio collection. *Molecular systems*  
513 *biology* 2, 1–11. <https://doi.org/10.1038/msb4100050>

514 Becker, J., Wittmann, C., 2012. Systems and synthetic metabolic engineering for amino  
515 acid production - the heartbeat of industrial strain development. *Current Opinion in*  
516 *Biotechnology* 23, 718–726. <https://doi.org/10.1016/j.copbio.2011.12.025>

517 Bellmann, A., Vrljić, M., Patek, M., Sahm, H., Kramer, R., Eggeling, L., 2001.  
518 Expression control and specificity of the basic amino acid exporter LysE of  
519 *Corynebacterium glutamicum*. *Microbiology* 147, 1765–1774.

520 Blattner, F.R., Plunkett, G.I., Bloch, a. C., Perna, T.N., Burland, V., Riley, M., Collado-  
521 Vides, J., Glasner, D.J., Rode, K.C., Mayhew, F.G., Gregor, J., Davis, W.N.,  
522 Kirkpatrick, a. H., Goeden, a. M., Rose, J.D., Mau, B., Shao, Y., 1997. The  
523 Complete Genome Sequence of *Escherichia coli* K-12. *Science* 277, 1453–1462.  
524 <https://doi.org/10.1126/science.277.5331.1453>

525 Borodina I. Understanding metabolite transport gives an upper hand in strain  
526 development. *Microb Biotechnol.* 2019;12(1):69-70.

527 Cock, P.J. a, Antao, T., Chang, J.T., Chapman, B. a, Cox, C.J., Dalke, A., Friedberg, I.,  
528 Hamelryck, T., Kauff, F., Wilczynski, B., de Hoon, M.J.L., 2009. Biopython: freely  
529 available Python tools for computational molecular biology and bioinformatics.  
530 *Bioinformatics (Oxford, England)* 25, 1422–3.  
531 <https://doi.org/10.1093/bioinformatics/btp163>

532 Consortium, T.U., 2014. UniProt: a hub for protein information. *Nucleic Acids Research*  
533 43, D204–D212. <https://doi.org/10.1093/nar/gku989>

534 Darbani B, Kell DB, Borodina I. Energetic evolution of cellular Transportomes. *BMC*  
535 *Genomics.* 2018, 19(1):418.

536 Darbani, B., Motawia, M.S., Olsen, C.E., Nour-Eldin, H.H., Møller, B.L., Rook, F.,  
537 2016. The biosynthetic gene cluster for the cyanogenic glucoside dhurrin in  
538 *Sorghum bicolor* contains its co-expressed vacuolar MATE transporter. *Scientific*  
539 *Reports* 6, 1–8. <https://doi.org/10.1038/srep37079>

540 Darbani B, Stovicek V, van der Hoek SA, Borodina I. Engineering energetically  
541 efficient transport of dicarboxylic acids in yeast *Saccharomyces cerevisiae*.*Proc*  
542 *Natl Acad Sci U S A.* 2019;116(39):19415-19420.

543 Daßler, T., Maier, T., Winterhalter, C., Böck, A., 2000. Identification of a major  
544 facilitator protein from *Escherichia coli* involved in efflux of metabolites of the  
545 cysteine pathway. *Molecular Microbiology* 36, 1101–1112.

- 546 <https://doi.org/10.1046/j.1365-2958.2000.01924.x>
- 547 Elder, M. World markets for fermentation ingredients, BCC Research: Market Research  
548 Reports. 2018. FOD020E. Available online: <http://www.bccresearch.com>
- 549 Eikmanns, B.J., Kleinertz, E., Liebl, W., Sahm, H., 1991. A family of *Corynebacterium*  
550 *glutamicum*/*Escherichia coli* shuttle vectors for cloning, controlled gene  
551 expression, and promoter probing. *Gene* 102, 93–98. [https://doi.org/10.1016/0378-1119\(91\)90545-M](https://doi.org/10.1016/0378-1119(91)90545-M)
- 553 Finn, R.D., Bateman, A., Clements, J., Coggill, P., Eberhardt, R.Y., Eddy, S.R., Heger,  
554 A., Hetherington, K., Holm, L., Mistry, J., Sonnhammer, E.L.L., Tate, J., Punta,  
555 M., 2014. Pfam: the protein families database. *Nucleic Acids Research* 42, D222–  
556 D230. <https://doi.org/10.1093/nar/gkt1223>
- 557 Forsberg, K.J., Patel, S., Witt, E., Wang, B., Ellison, T.D., Dantas, G., 2016.  
558 Identification of genes conferring tolerance to lignocellulose-derived inhibitors by  
559 functional selections in soil metagenomes. *Applied and Environmental*  
560 *Microbiology* 82, 528–537. <https://doi.org/10.1128/AEM.02838-15>
- 561 Franke, I., Resch, A., Daßler, T., Maier, T., Bock, A., 2003. YfiK from *Escherichia coli*  
562 Promotes Export of O -Acetylserine and Cysteine. *Journal of bacteriology* 185,  
563 1161–1166. <https://doi.org/10.1128/JB.185.4.1161>
- 564 Gunji, Y., Yasueda, H., 2006. Enhancement of l-lysine production in methylotroph  
565 *Methylophilus methylotrophus* by introducing a mutant LysE exporter. *Journal of*  
566 *Biotechnology* 127, 1–13. <https://doi.org/10.1016/j.jbiotec.2006.06.003>
- 567 Hayashi, K., Morooka, N., Yamamoto, Y., Fujita, K., Isono, K., Choi, S., Ohtsubo, E.,  
568 Baba, T., Wanner, B.L., Mori, H., Horiuchi, T., 2006. Highly accurate genome  
569 sequences of *Escherichia coli* K-12 strains MG1655 and W3110. *Molecular*  
570 *Systems Biology* 2. <https://doi.org/10.1038/msb4100049>
- 571 Hemberger, S., Pedrolli, D.B., Stolz, J., Vogl, C., Lehmann, M., Mack, M., 2011. RibM  
572 from *Streptomyces davawensis* is a riboflavin/roseoflavin transporter and may be  
573 useful for the optimization of riboflavin production strains. *BMC Biotechnology*  
574 11, 119. <https://doi.org/10.1186/1472-6750-11-119>
- 575 Imaizumi, A., Takikawa, R., Koseki, C., Usuda, Y., Yasueda, H., Kojima, H., Matsui,  
576 K., Sugimoto, S.-I., 2005. Improved production of L-lysine by disruption of  
577 stationary phase-specific *rmf* gene in *Escherichia coli*. *Journal of biotechnology*  
578 117, 111–8. <https://doi.org/10.1016/j.jbiotec.2004.12.014>
- 579 Jensen, S.I., Lennen, R.M., Herrgård, M.J., Nielsen, A.T., 2015. Seven gene deletions in  
580 seven days: Fast generation of *Escherichia coli* strains tolerant to acetate and  
581 osmotic stress. *Scientific Reports* 5, 17874. <https://doi.org/10.1038/srep17874>
- 582 Käll, L., Krogh, A., Sonnhammer, E.L.L., 2007. Advantages of combined  
583 transmembrane topology and signal peptide prediction-the Phobius web server.  
584 *Nucleic Acids Research* 35, 429–432. <https://doi.org/10.1093/nar/gkm256>
- 585 Keilhauer, C., Eggeling, L., Sahm, H., 1993. Isoleucine synthesis in *Corynebacterium*  
586 *glutamicum*: Molecular analysis of the *ilvB-ilvN-ilvC* operon. *Journal of*



- 587 Bacteriology 175, 5595–5603.
- 588 Kelle, R., Laufer, B., Brunzema, C., Weuster-Botz, D., Krämer, R., Wandrey, C., 1996.  
589 Reaction engineering analysis of L-lysine transport by *Corynebacterium*  
590 *glutamicum*. *Biotechnology and Bioengineering* 51, 40–50.  
591 [https://doi.org/10.1002/\(SICI\)1097-0290\(19960705\)51:1<40::AID-](https://doi.org/10.1002/(SICI)1097-0290(19960705)51:1<40::AID-BIT5>3.0.CO;2-0)  
592 [BIT5>3.0.CO;2-0](https://doi.org/10.1002/(SICI)1097-0290(19960705)51:1<40::AID-BIT5>3.0.CO;2-0)
- 593 Kikuchi, Y., Kojima, H., Tanaka, T., Takatsuka, Y., Kamio, Y., 1997. Characterization  
594 of a second lysine decarboxylase isolated from *Escherichia coli*. *Journal of*  
595 *bacteriology* 179, 4486–4492.
- 596 Lee, S.Y., Kim, H.U., 2015. Systems strategies for developing industrial microbial  
597 strains. *Nature Biotechnology* 33, 1061–1072. <https://doi.org/10.1038/nbt.3365>
- 598 Lutz, R., Bujard, H., 1997. Independent and tight regulation of transcriptional units in  
599 *Escherichia coli* via the LacR/O, the TetR/O and AraC/I1-I2 regulatory elements.  
600 *Nucleic Acids Research* 25, 1203–1210. <https://doi.org/10.1093/nar/25.6.1203>
- 601 Malla, S., Niraula, N.P., Liou, K., Sohng, J.K., 2010. Self-resistance mechanism in  
602 *Streptomyces peuceletii*: Overexpression of *drxA*, *drxB* and *drxC* for doxorubicin  
603 enhancement. *Microbiological Research* 165, 259–267.
- 604 Munck, C., Albertsen, M., Telke, A., Ellabaan, M., Nielsen, P.H., Sommer, M.O. a.,  
605 2015. Limited dissemination of the wastewater treatment plant core resistome.  
606 *Nature Communications* 6, 8452. <https://doi.org/10.1038/ncomms9452>
- 607 Omasits, U., Ahrens, C.H., Müller, S., Wollscheid, B., 2014. Protter: Interactive protein  
608 feature visualization and integration with experimental proteomic data.  
609 *Bioinformatics* 30, 884–886. <https://doi.org/10.1093/bioinformatics/btt607>
- 610 Pathania, A., Sardesai, A. a., 2015. Distinct paths for basic amino acid export in  
611 *Escherichia coli*: YbjE (LysO) mediates export of L-lysine. *Journal of Bacteriology*  
612 197, 2036–2047. <https://doi.org/10.1128/JB.02505-14>
- 613 Rouanet, C., Nasser, W., 2001. The PecM protein of the phytopathogenic bacterium  
614 *Erwinia chrysanthemi*, membrane topology and possible involvement in the efflux  
615 of the blue pigment. *Journal of Molecular Microbiology and Biotechnology* 3, 309–  
616 318.
- 617 Sambrook, J., Russell, D.W., 2001. *Molecular Cloning: A Laboratory Manual*, Third.  
618 ed. Cold Spring Harbor Laboratory Press, Cold Spring Harbor, NY.
- 619 Sommer, M.O. a, Church, G.M., Dantas, G., 2010. A functional metagenomic approach  
620 for expanding the synthetic biology toolbox for biomass conversion. *Molecular*  
621 *systems biology* 6. <https://doi.org/10.1038/msb.2010.16>
- 622 Sommer, M.O. a, Dantas, G., Church, G.M., 2009. Functional characterization of the  
623 antibiotic resistance reservoir in the human microflora. *Science (New York, N.Y.)*  
624 325, 1128–31. <https://doi.org/10.1126/science.1176950>
- 625 van der Helm, E., Geertz-Hansen, H.M., Genee, H.J., Malla, S., Sommer, M.O.A., 2015.  
626 deFUME: Dynamic exploration of functional metagenomic sequencing data. *BMC*

- 627            Research Notes 8, 328–330. <https://doi.org/10.1186/s13104-015-1281-y>
- 628            Vrljic, M., Garg, J., Bellmann, A., Wachi, S., Freudi, R., Malecki, M., Sahm, H.,  
629            Kozina, V., Eggeling, L., Saier, M., 1999. The LysE Superfamily : Topology of the  
630            Lysine Exporter LysE of *Corynebacterium glutamicum* , a Paradyme for a Novel  
631            Superfamily of Transmembrane Solute Translocators Real-Time PCR  
632            Bioinformatics and Data. *Journal of Molecular Microbiology and Biotechnology* 1,  
633            327–336.
- 634            Vrljic, M., Sahm, H., Eggeling, L., 1996. A new type of transporter with a new type of  
635            cellular function : L -lysine export from *Corynebacterium glutamicum*. *Molecular*  
636            *Microbiology* 22, 815–826.
- 637

638            **Table legends**

639    **Table 1.** Bacterial strains and plasmids used in this study.

640    **Table 2.** Oligonucleotides used in this study.

641

642 **Table 1.** Bacterial strains and plasmids used in this study.

| Strains/Plasmids                  | Description                                                                                                                                        | Source/reference        |
|-----------------------------------|----------------------------------------------------------------------------------------------------------------------------------------------------|-------------------------|
| <b>Strains</b>                    |                                                                                                                                                    |                         |
| <i>Escherichia coli</i>           |                                                                                                                                                    |                         |
| DH5 $\alpha$                      | General cloning host                                                                                                                               | Invitrogen              |
| Top10                             | Highly-efficient host for cloning and plasmid propagation                                                                                          | Invitrogen              |
| BL21(DE3)                         | <i>ompT hsdT hsdS</i> (r <sub>B</sub> m <sub>B</sub> ) <i>gal</i> (DE3)                                                                            | Novagen                 |
| C4860                             | Host for phage PhiX174, sup-, lambda-, F-, (now known as DSM 13127)                                                                                | DSMZ                    |
| MG1655                            | F <sup>-</sup> ilvG <sup>-</sup> rfb-50 rph-1                                                                                                      | (Blattner et al., 1997) |
| W3110                             | F <sup>-</sup> lambda <sup>-</sup> IN(rrnD-rrnE)1 rph-1                                                                                            | (Hayashi et al., 2006)  |
| W1116                             | strain W and ATCC 9637                                                                                                                             | (Archer et al., 2011)   |
| Crooks                            | <i>E. coli</i> ATCC 8739                                                                                                                           | DSMZ                    |
| BL21/pZE21                        | <i>E. coli</i> BL21 carrying pZE21                                                                                                                 | This study              |
| C4860/pZE21                       | <i>E. coli</i> C4860 carrying pZE21                                                                                                                | This study              |
| MG1655/pZE21                      | <i>E. coli</i> MG1655 carrying pZE21                                                                                                               | This study              |
| W3110/pZE21                       | <i>E. coli</i> W3110 carrying pZE21                                                                                                                | This study              |
| W1116/pZE21                       | <i>E. coli</i> W1116 carrying pZE21                                                                                                                | This study              |
| Crooks/pZE21                      | <i>E. coli</i> Crooks carrying pZE21                                                                                                               | This study              |
| BL21(DE3)/pZE-RCL-MglE            | <i>E. coli</i> BL21 carrying pZE-RCL-MglE                                                                                                          | This study              |
| C4860/pZE-RCL-MglE                | <i>E. coli</i> C4860 carrying pZE-RCL-MglE                                                                                                         | This study              |
| MG1655/pZE-RCL-MglE               | <i>E. coli</i> MG1655 carrying pZE-RCL-MglE                                                                                                        | This study              |
| W3110/pZE-RCL-MglE                | <i>E. coli</i> W3110 carrying pZE-RCL-MglE                                                                                                         | This study              |
| W1116/pZE-RCL-MglE                | <i>E. coli</i> W1116 carrying pZE-RCL-MglE                                                                                                         | This study              |
| Crooks/pZE-RCL-MglE               | <i>E. coli</i> Crooks carrying pZE-RCL-MglE                                                                                                        | This study              |
| C4860/pZE-MglE                    | <i>E. coli</i> C4860 carrying pZE-MglE                                                                                                             | This study              |
| C4860/pZE0-P-MglE-T               | <i>E. coli</i> C4860 carrying pZE0-P-MglE-T                                                                                                        | This study              |
| C4860/pZE-YbjE                    | <i>E. coli</i> C4860 carrying pZE-YbjE                                                                                                             | This study              |
| C4860/pZE-Gene1                   | <i>E. coli</i> C4860 carrying pZE-Gene1                                                                                                            | This study              |
| C4860/pZE-Gene2                   | <i>E. coli</i> C4860 carrying pZE-Gene2                                                                                                            | This study              |
| C4860/pZE-Gene3                   | <i>E. coli</i> C4860 carrying pZE-Gene3                                                                                                            | This study              |
| C4860/pZE-Gene4                   | <i>E. coli</i> C4860 carrying pZE-Gene4                                                                                                            | This study              |
| W3110/pSIJ8                       | <i>E. coli</i> W3110 carrying pSIJ8                                                                                                                | This study              |
| W3110::ΔldcC/pSIJ8                | <i>ldcC</i> deletion mutant of <i>E. coli</i> W3110 carrying pSIJ8                                                                                 | This study              |
| W3110::ΔldcC.ΔcadA/pSIJ8          | <i>ldcC</i> and <i>cadA</i> deletion mutant of <i>E. coli</i> W3110 (DMLC) carrying pSIJ8                                                          | This study              |
| DMLC                              | <i>ldcC</i> and <i>cadA</i> deletion mutant of <i>E. coli</i> W3110                                                                                | This study              |
| DMLC/pZE21                        | <i>E. coli</i> DMLC carrying pZE21                                                                                                                 | This study              |
| DMLC/pZE-RCL-MglE                 | <i>E. coli</i> DMLC carrying pZE-RCL-MglE                                                                                                          | This study              |
| Kieo strain                       |                                                                                                                                                    |                         |
| b0186                             | <i>ldcC</i> replaced by kanamycin cassette <i>E. coli</i> K-12 BW25113                                                                             | (Baba et al., 2006)     |
| b4131                             | <i>cadA</i> replaced by kanamycin cassette in <i>E. coli</i> K-12 BW25113                                                                          | (Baba et al., 2006)     |
| <i>Corynebacterium glutamicum</i> |                                                                                                                                                    |                         |
| VL5                               | Industrial L-lysine production strain of <i>C. glutamicum</i>                                                                                      | Vitalys                 |
| VL5/pEKEx2                        | <i>C. glutamicum</i> VL5 carrying pEKEx2                                                                                                           | This study              |
| VL5/pEK-RCL-MglE                  | <i>C. glutamicum</i> VL5 carrying pEK-RCL-MglE                                                                                                     | This study              |
| <b>Plasmids and vectors</b>       |                                                                                                                                                    |                         |
| pZE21                             | <i>E. coli</i> expression vector with pLtet promoter, pBR322 origin of replication, and kanamycin cassette                                         | (Lutz and Bujard, 1997) |
| pSIJ8                             | pKD46 based vector with rhaRS-prha-FLP and ampicillin cassette                                                                                     | (Jensen et al., 2015)   |
| pUSER016                          | pNB1u based vector with T7 promoter for in vitro transcription                                                                                     | (Darbani et al., 2016)  |
| pEKEx2                            | IPTG inducible <i>C. glutamicum</i> expression vector with kanamycin cassette from pUC4 K; Ptrc, lacI, pUC18 mcs, and pBL1 origin of replications. | (Eikmanns et al., 1991) |
| pZE-RCL-MglE                      | pZE21 carrying L-lysine resistant metagenomic insert with MglE operon from cow fecal sample                                                        | This study              |
| pZE-MglE                          | pZE21 carrying <i>mglE</i> gene                                                                                                                    | This study              |
| pZE0-P-MglE-T                     | Promoter less pZE21 carrying native promoter and <i>mglE</i> gene and native terminator region                                                     | This study              |
| pUSER016-pT7-MglE                 | Codon optimized MglE gene cloned into pUSER016 for functional studies in <i>Xenopus oocytes</i>                                                    | This study              |
| pEK-RCL-MglE                      | pEKEx2 carrying L-lysine resistant metagenomic insert with MglE operon from cow fecal sample                                                       | This study              |
| pZE-YbjE                          | pZE21 carrying <i>ybjE</i> gene from <i>E. coli</i> BL21(DE3)                                                                                      | This study              |
| pZE-Gene1                         | pZE21 carrying gene from <i>Bacteroides coprophilus</i> CAG:333 having 82% identity with <i>mglE</i>                                               | This study              |
| pZE-Gene2                         | pZE21 carrying codon optimized gene from <i>Bacteroides barnesiae</i> having 78% identity with <i>mglE</i>                                         | This study              |
| pZE-Gene3                         | pZE21 carrying gene from <i>Bacteroides</i> sp. CAG:770 having 54% identity with <i>mglE</i>                                                       | This study              |
| pZE-Gene4                         | pZE21 carrying codon optimized gene from <i>Alistipes fingoldii</i> CAG:68 having 43% identity with <i>mglE</i>                                    | This study              |

643 **Table 2.** Oligonucleotides used in this study.

| Primers                                   | Oligonucleotide sequences (5'-3')          | Restriction site |
|-------------------------------------------|--------------------------------------------|------------------|
| pZE21_F                                   | ATCAGTGATAGAGATACTGAGCAC                   |                  |
| pZE21_R                                   | TTTCGTTTTATTGATGCCTCTAG                    |                  |
| MglE_F                                    | AAA <u>GGTACC</u> ATGAGAAATTTAAGTAAAAAAGC  | <i>KpnI</i>      |
| MglE_R                                    | TTAA <u>AGCTT</u> CTATCTCTTTGTTACTGAAATCAT | <i>HindIII</i>   |
| RCL-MglE-F                                | CGG <u>GGTACC</u> AAGAGGAGAAAGGTACCGGGC    | <i>KpnI</i>      |
| RCL-MglE-R                                | <u>CGAGCT</u> CCCGGGCTGCAGGAATTCG          | <i>SacI</i>      |
| YbjE_F                                    | AAA <u>GGTACC</u> ATGTTTTCTGGGCTGTTAATCA   | <i>KpnI</i>      |
| YbjE_R                                    | TAT <u>GGATCC</u> TTACGCAGAGAAAAAGGCGAT    | <i>BamHI</i>     |
| linear_cassette F                         | TGCAAGGCGATTAAGTTGGGTAACGC                 |                  |
| linear_cassette R                         | CCATGATTACGCCAAGCTATTTAGGTGACAC            |                  |
| <b>For User Cloning</b>                   |                                            |                  |
| pZE21_User_F                              | ATAAGACGGU ATCGATAAGCTTGATATCGAATTCC       |                  |
| pZE21_User_R                              | AGGGTACCCU CGAGGTGAAGACGAAAGGGCCTCG        |                  |
| P-MglE-T_User_F                           | AGGGTACCCU GAAGTCAAGCATCTCAAAAACTAC        |                  |
| P-MglE-T_User_R                           | ACCGTCTTAU TTACGATTTTACTACGGAGTATTAA       |                  |
| pZE21_User_F4                             | ATAAGCTU GATATCGAATTCTGCAGCCC              |                  |
| pZE21_User_R4                             | AATGAATU CGGTCAGTGCCTCTGCTGAT              |                  |
| <b>For gene deletion and confirmation</b> |                                            |                  |
| Idc_F1                                    | TCAGCGCCTGATGAGCTACG                       |                  |
| Idc_F2                                    | AGTTCTGAAAAAGGGTCACTTC                     |                  |
| Idc_R                                     | TCGCAATATGGTGAACCTGTT                      |                  |
| CadA_F1                                   | TGAAGTACTCCAGATTTGGATC                     |                  |
| CadA_F2                                   | CGGCTGTGAGGGTGTTTTCA                       |                  |
| CadA_R                                    | TTAATTTAAAAGTATTTTCCGAGGCTCC               |                  |

644 Restriction sites are indicated by underlined and *italics*.

645

646 **Figure legends**

647 **Figure 1. Functional metagenomic screening and Lysine tolerance of the screened metagenomics**  
648 **clones.**

- 649 A. Functional metagenomic screening for lysine transporters. Cow fecal metagenomic DNA library  
650 construction and its functional selection for L-lysine exporters.
- 651 B. L-lysine IC<sub>90</sub> values for the selected *E. coli* C4860 resistant clones harboring putative transporters.
- 652 C. The growth rates of *E. coli* C4860 harboring pZE-RCL-MgIE and pZE21 (control) in LB-Km and LB-  
653 Km supplemented with 8 g/L of L-lysine.
- 654 D. Improved L-lysine tolerance (IC<sub>90</sub> values) by expression of metagenomics insert carrying MgIE  
655 transporter in industrially relevant *E. coli* strains.

656

657 **Figure 2. *In silico* analysis of the metagenomic insert contained in pZE-RCL-MgIE plasmid and L-**  
658 **lysine tolerance of its subclones**

- 659 A. The metagenomic insert present in the pZE-RCL-MgIE plasmid is shown. P: promoter region, MgIE:  
660 membrane bound transporter protein, and T: terminator sequence.
- 661 B. The membrane topology of the MgIE transporter protein showing 6 cytoplasmic regions, 5 periplasmic  
662 regions, and 10 transmembrane  $\alpha$ -helices. The 15 BLASTp hits with a >50% sequence identity were  
663 aligned to MgIE and the conservation (bitscore) for each residues was calculated using the Biopython  
664 package (Cock et al., 2009).
- 665 C. A Maximum Likelihood phylogenetic protein tree containing all the significant (sequence identity  
666 >50%) BLASTp hits in the UniProtKB database against MgIE. The percentage identity of the 15 hits  
667 is shown as horizontal bars. The presence of a LysE family member in the genomes is shown with an  
668 orange dot. The highest homology with MgIE is found in *Bacteroides coprophilus* CAG:333, with 82%  
669 sequence identity.
- 670 D. The strategy for subcloning the MgIE transporter with or without its native promoter and the resultant  
671 L-lysine tolerance phenotypes for the *E. coli* C4860 strain are shown. The biomass of the strains (at 24  
672 h) cultured in LB media was also shown in terms of OD in closed circles.

673

674 **Figure. 3.** Functional characterization of MglE transporter activity in *Xenopus* oocytes, *E.coli* and *C.*  
675 *glutamicum*

676 A. L-lysine export assay of MglE transporter in *Xenopus* oocytes in Kulori buffer i) at pH 5 and ii) at  
677 pH 7.4. The bars represent lysine contents in the oocytes or the buffer (means,  $\pm$  Std., 3-4 biological  
678 replicates each involving 20 oocytes). Significant changes are in comparison with the controls  
679 marked by asterisks (\*\*  $p < 0.01$ ; Fishers one-way ANOVA).

680 B. The extracellular L-lysine concentration of reference *E. coli* W3110 and its isogenic mutant strain  
681 DMLC along with the cell OD<sub>600nm</sub> values confirming the exporter activity of the MglE protein in  
682 i) LB media and ii) in M9 minimal media supplemented with yeast extract (\*  $p < 0.0001$ , t-test).

683 C. Fold enhancement of specific productivity of L-lysine by MglE protein in the industrial *C.*  
684 *glutamicum* VL5 strain compared to the empty vector control. Error bars are s.e.m, \* denotes  $p =$   
685 0.023, n=4).

686

687 **Figure. 4.** Comparison of lysine tolerance (presented in relative IC90 values) displayed by MglE, YbjE  
688 (Lysine specific exporter from *E.coli*) and four synthetic MglE homologs. The biomass of the strains (at 24  
689 h) cultured in LB media was also shown in closed circles.

690

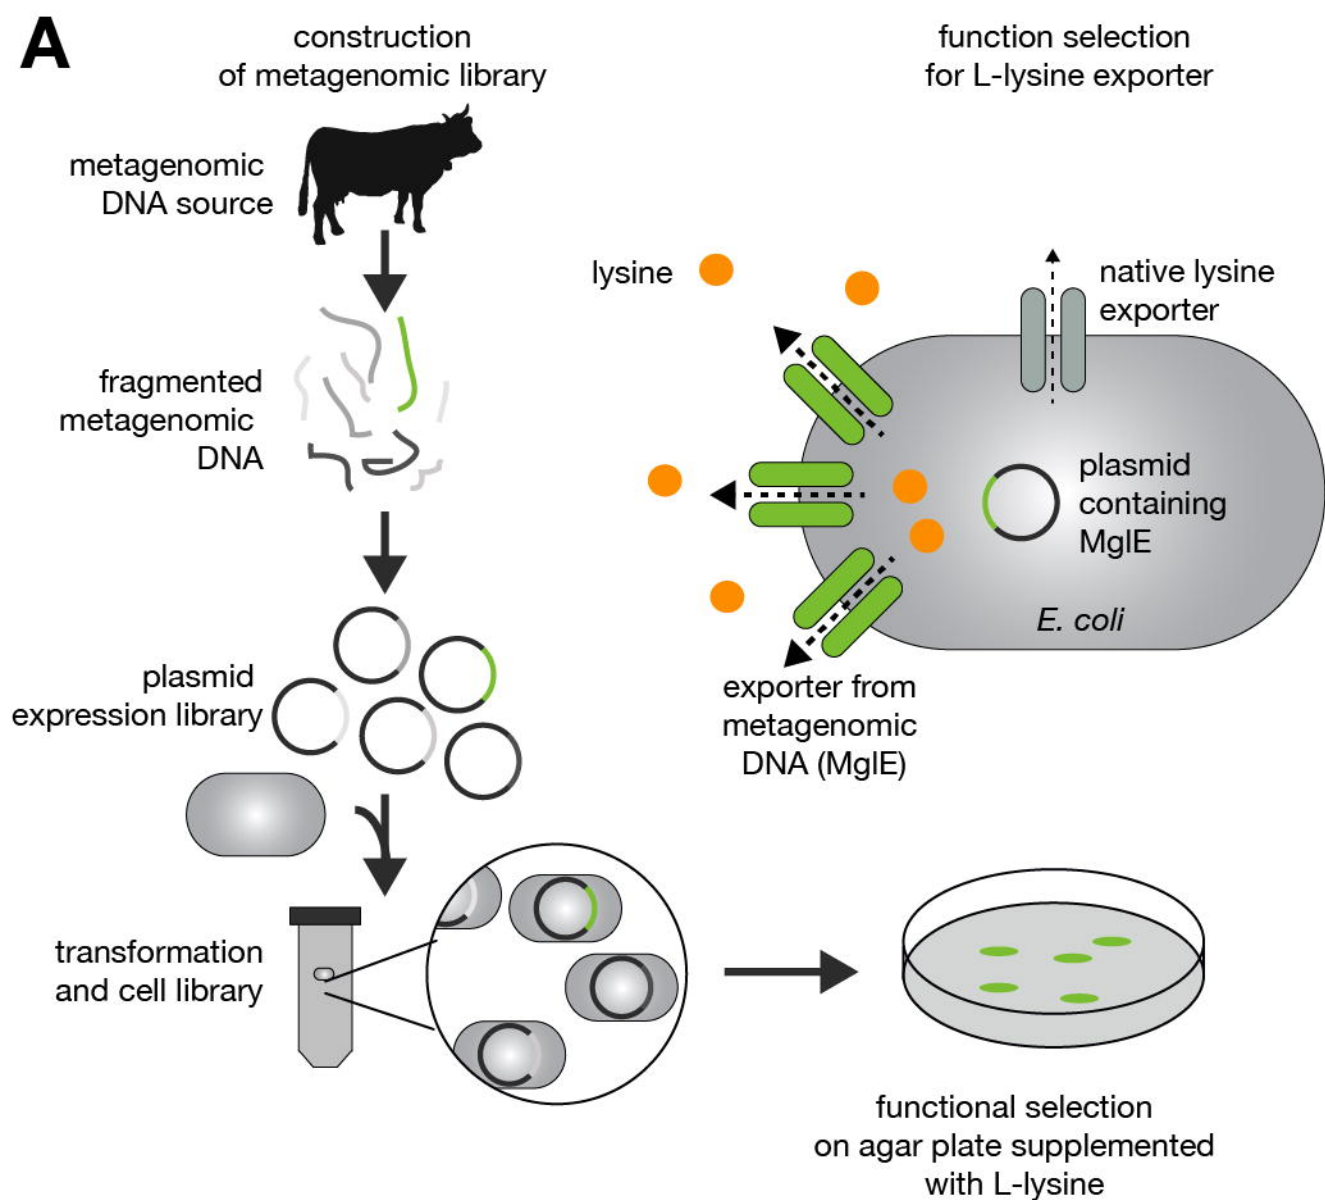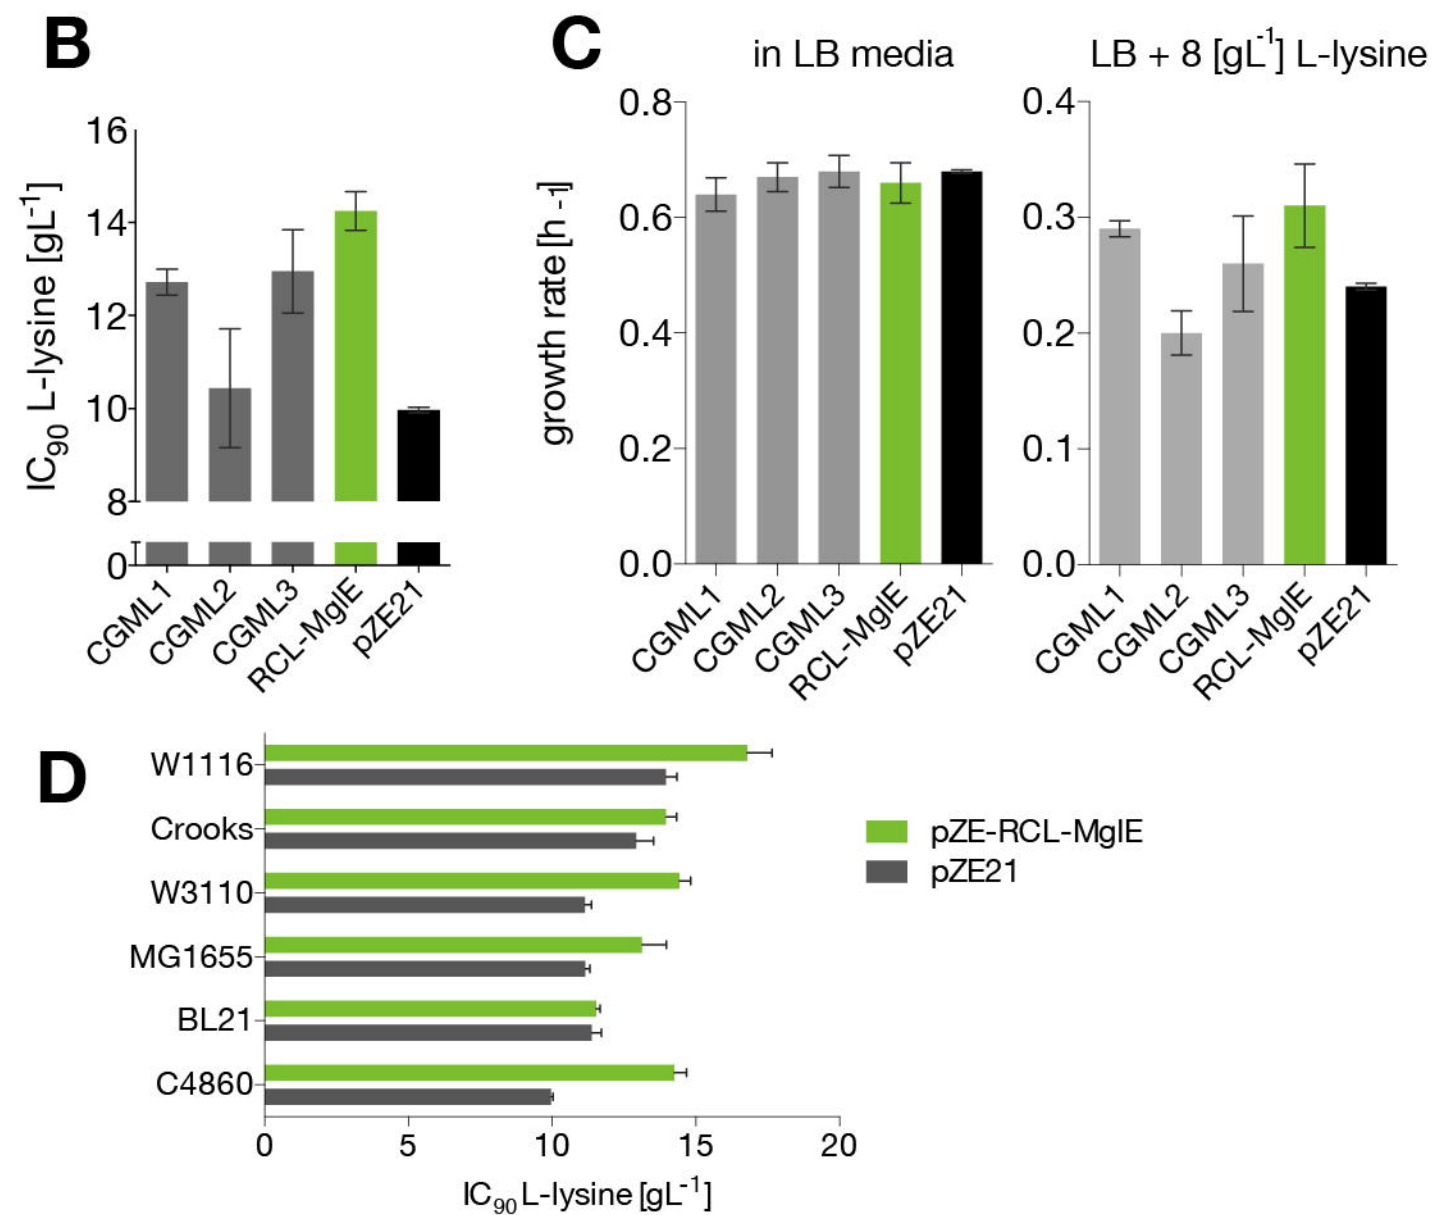



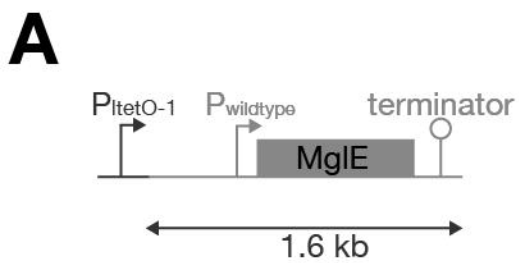

**C**

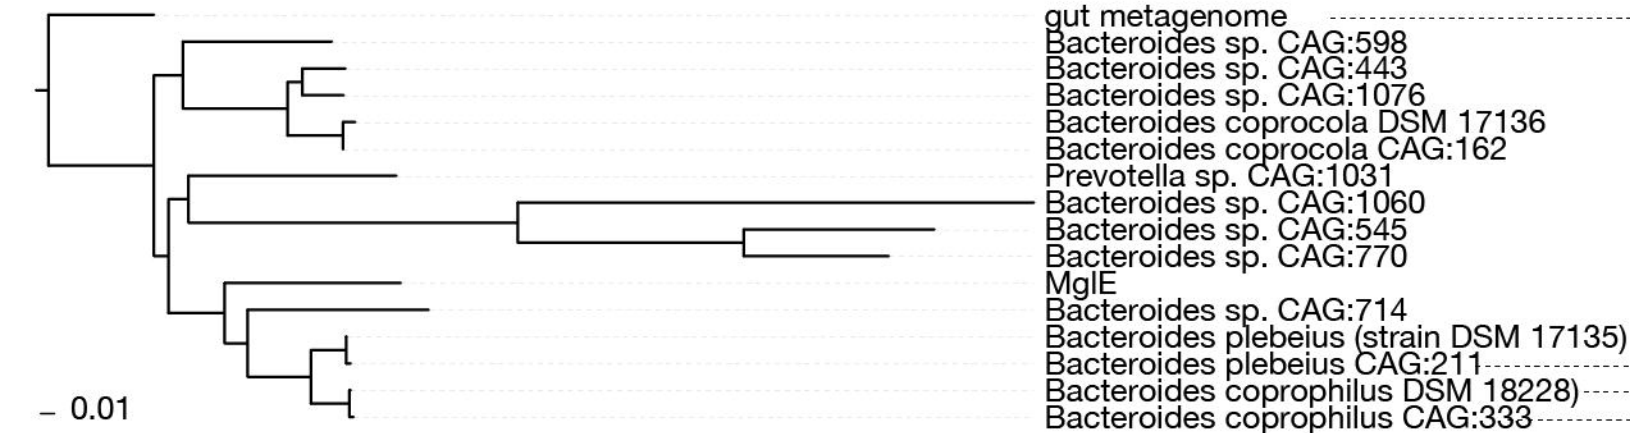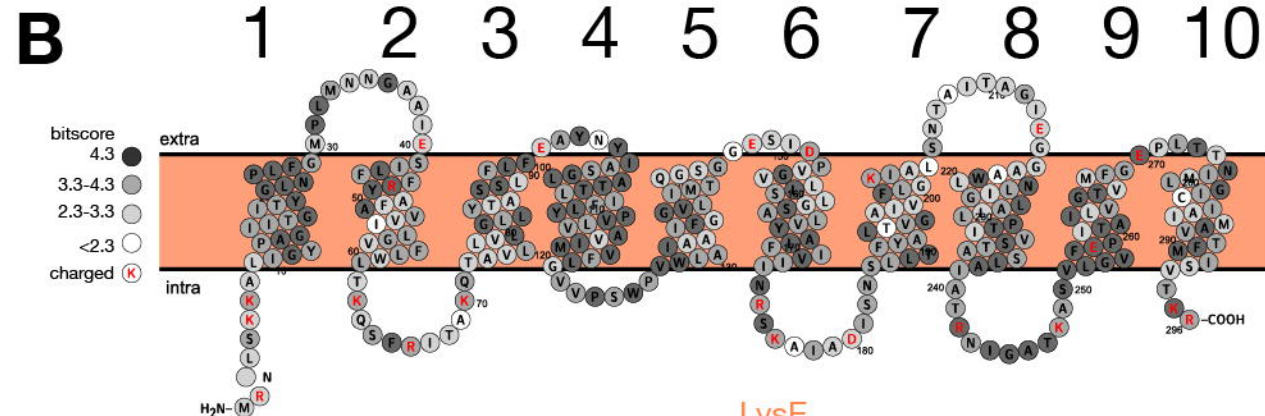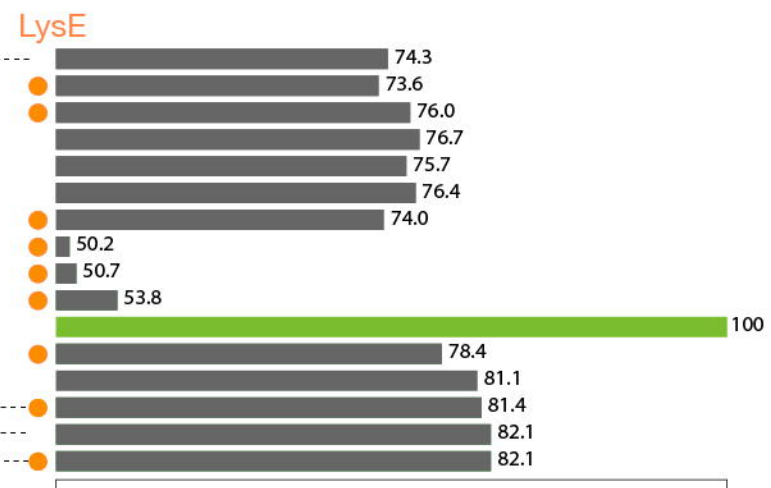

**D**

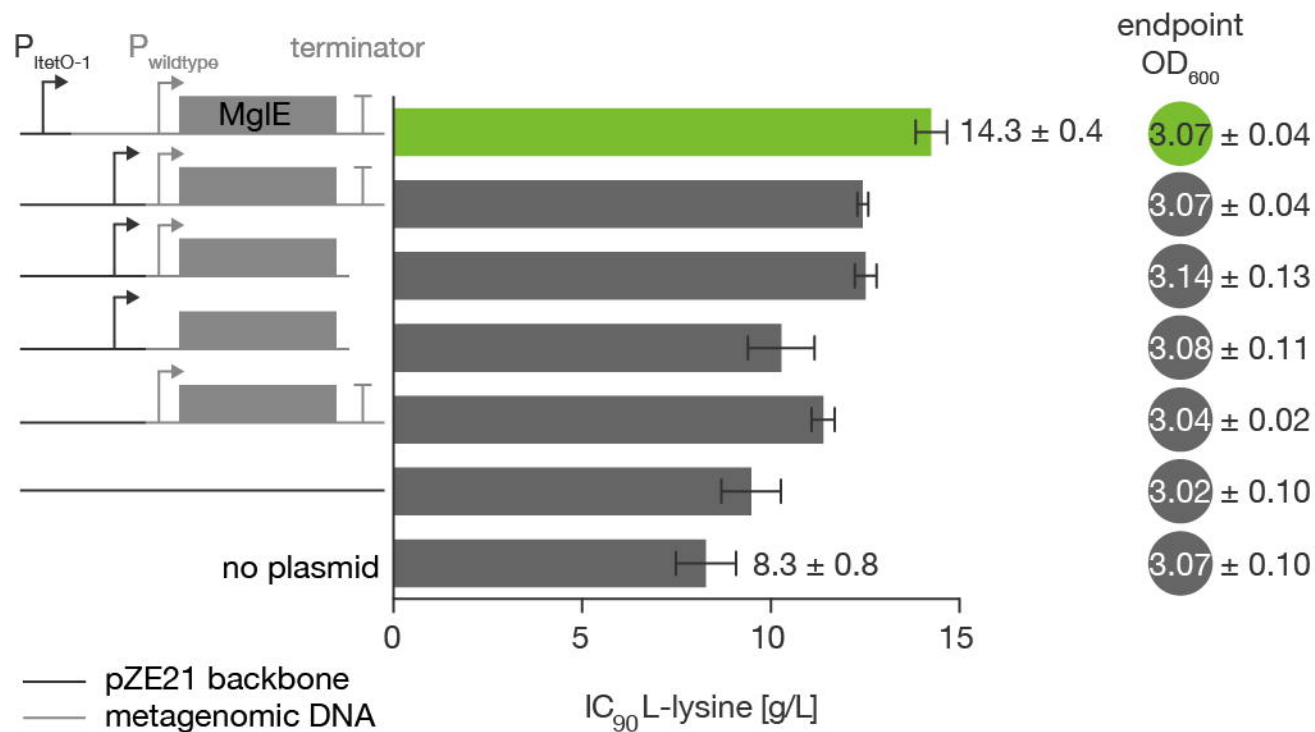

**A i)**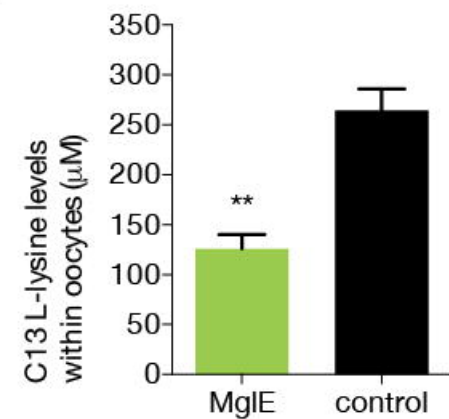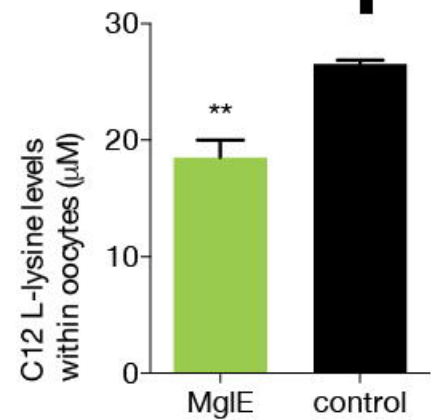**pH 5.0**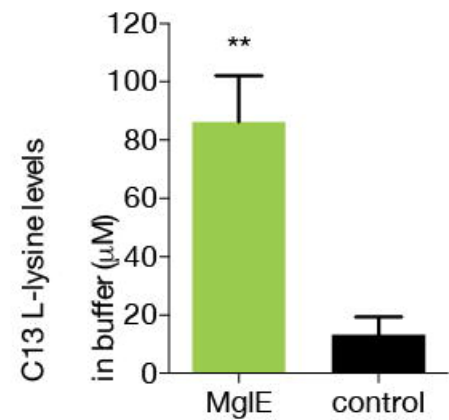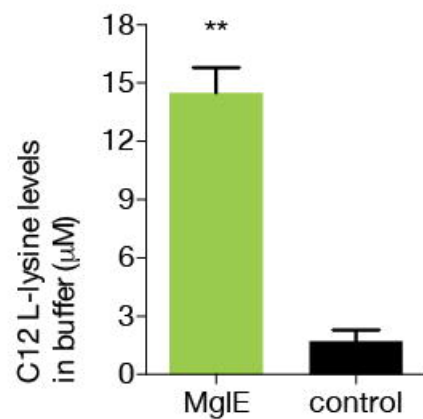**ii)**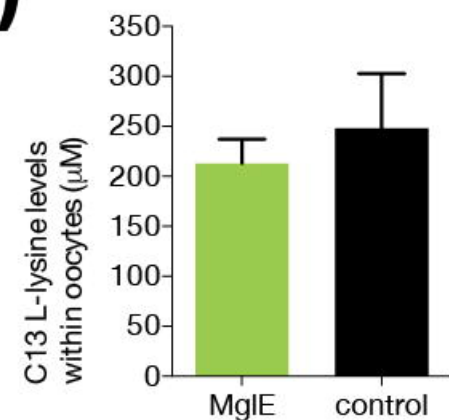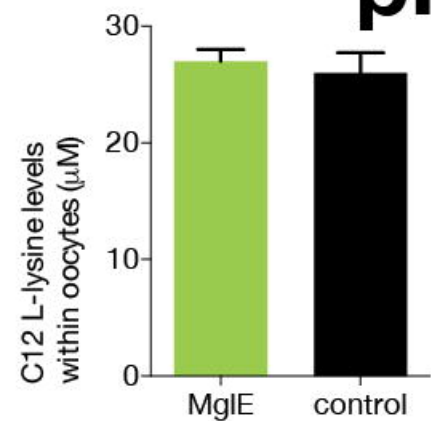**pH 7.4**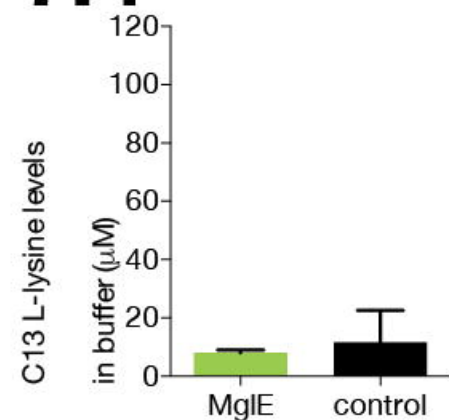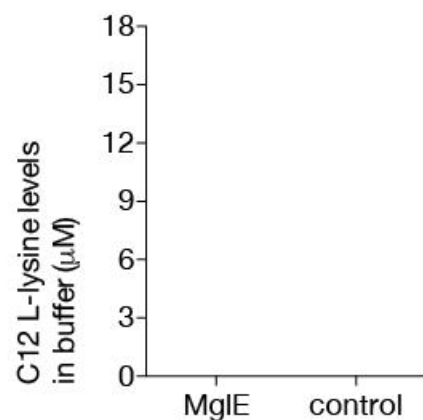**B i)**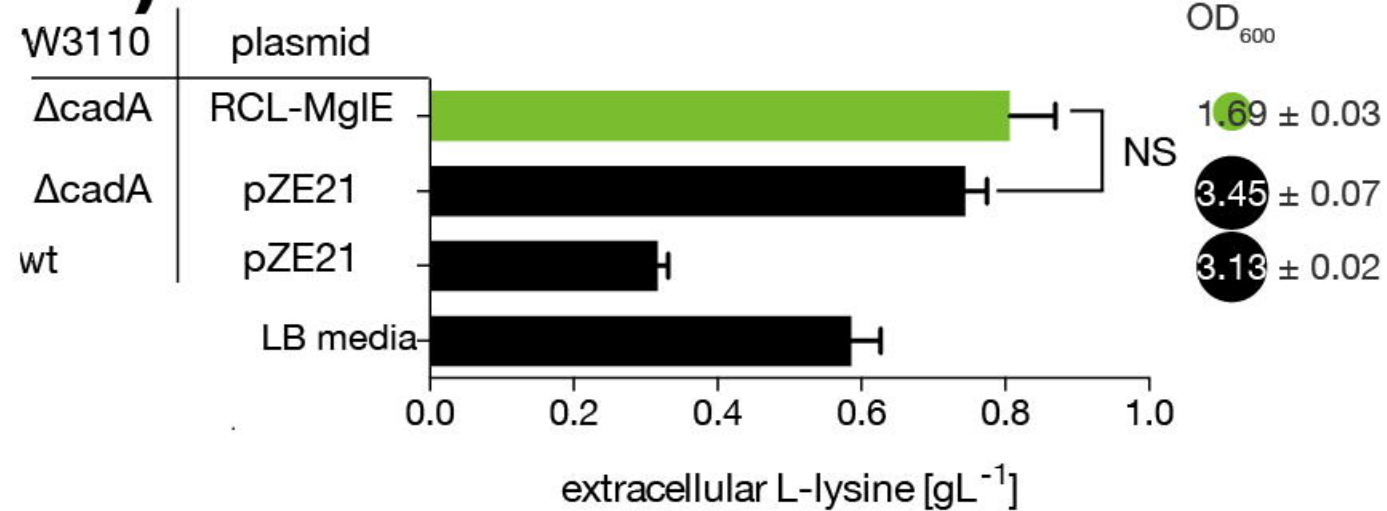**B ii)**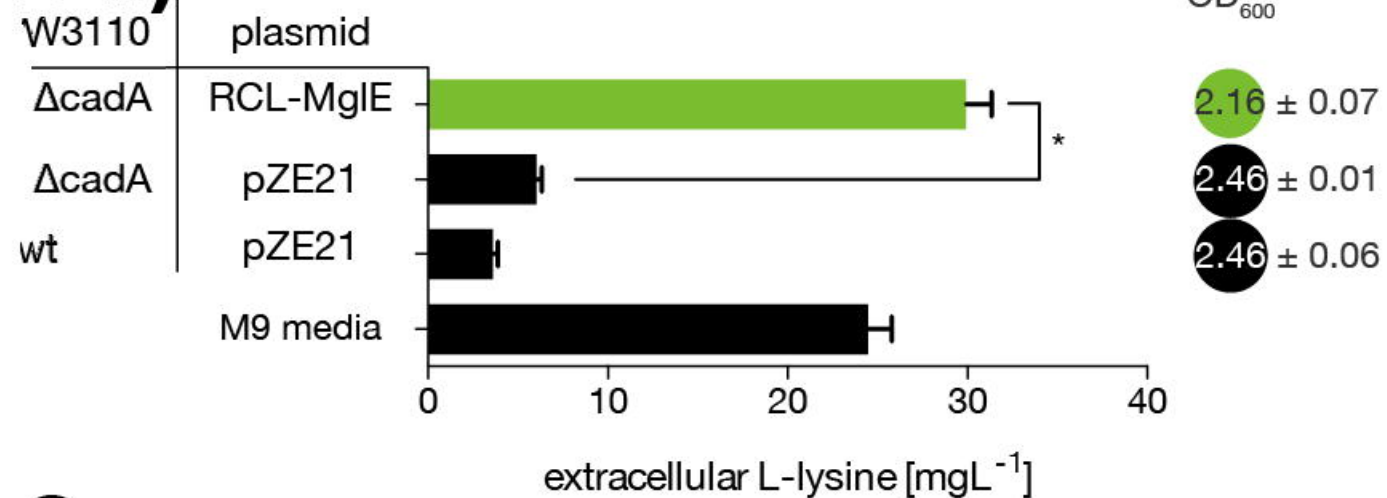**C**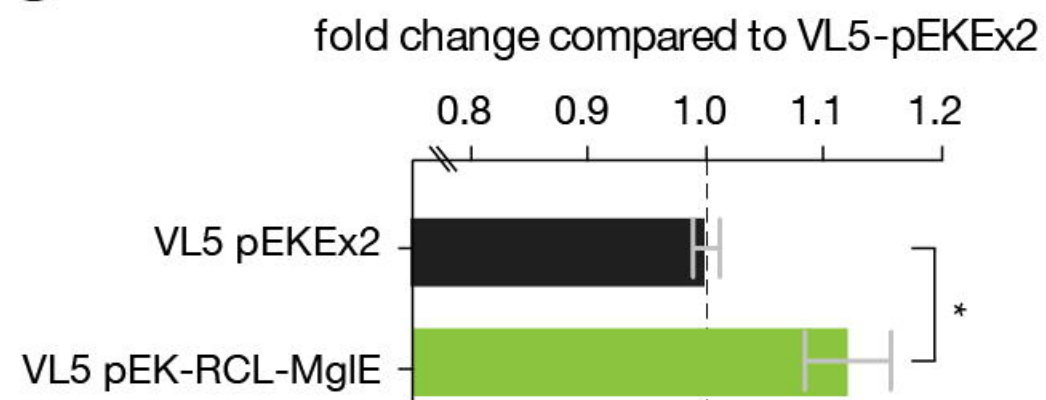

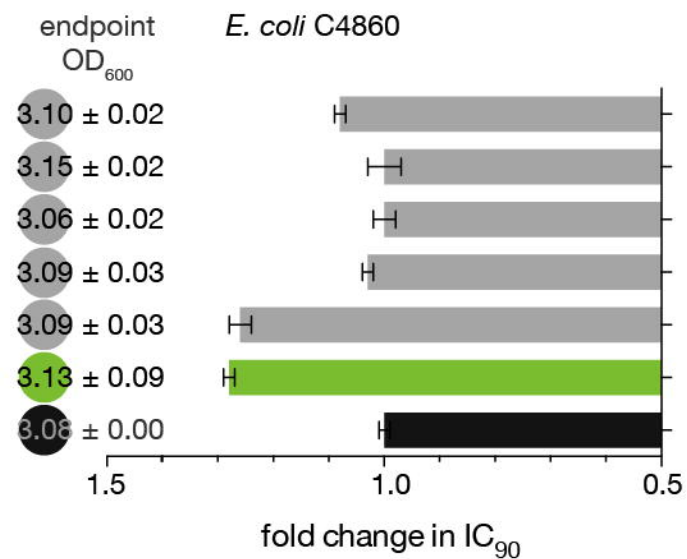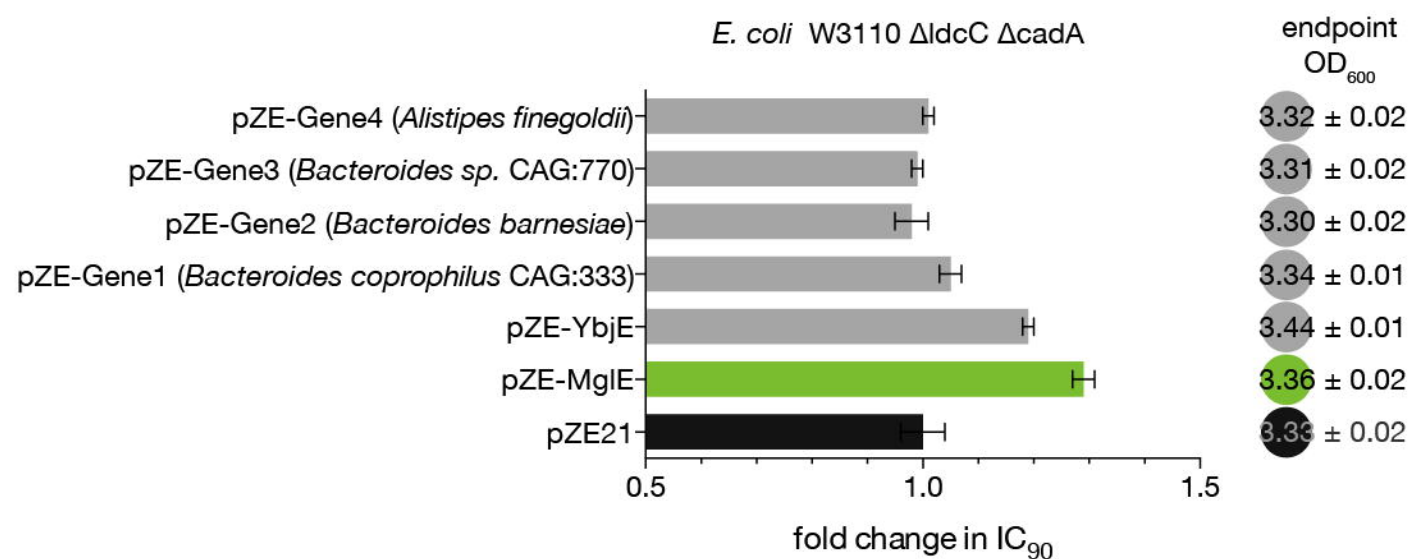

Source: https://www.biorxiv.org/content/biorxiv/early/2020/05/02/2020.04.30.071142.full.pdf
